# Supplementary material
Source: HighWire-hosted journal article supplement (https://bmjopen.bmj.com/content/8/10/e017895)
Supplement: inline-supplementary-material-1 [file inline-supplementary-material-1.pdf]

## Information Needs in Diabetes Questionnaire

1. Listed below are various topics relating to diabetes. Please have a look at this list and then consider which three topics you would currently like to have further information about. Finally, please enter these topics in the answer boxes below and explain what particular interests you have about these topics.

| Topics relating to diabetes |                                                       |
|-----------------------------|-------------------------------------------------------|
| A                           | Causes of diabetes                                    |
| B                           | Course of the disease                                 |
| C                           | Treatment/therapy                                     |
| D                           | Acute complications                                   |
| E                           | Late complications                                    |
| F                           | Diabetes in everyday life                             |
| G                           | Mental strain                                         |
| H                           | Lifestyle adjustment, health promotion and prevention |
| I                           | Support, helplines and information sources            |
| J                           | Social and legal aspects                              |
| K                           | Scientific surveys and research on diabetes           |
| L                           | Other topics not included in the list                 |

Please enter the letters representing the three topics about which you would currently like to have further information. Please explain what particularly interests you have about these topics.

**Topic**

**I am particularly interested in**



---



---




---



---




---



---

2. Please specify how well informed you are on the following topics and whether you currently wish to have further information on each of these topics.

| How well informed are you on the following topics?    |                                    |                               |                                   |                                              | Would you currently like information on the topic? |                             |
|-------------------------------------------------------|------------------------------------|-------------------------------|-----------------------------------|----------------------------------------------|----------------------------------------------------|-----------------------------|
| Causes of diabetes                                    | <input type="checkbox"/> very well | <input type="checkbox"/> well | <input type="checkbox"/> not well | <input type="checkbox"/> not informed at all | <input type="checkbox"/> yes                       | <input type="checkbox"/> no |
| Course of the disease                                 | <input type="checkbox"/> very well | <input type="checkbox"/> well | <input type="checkbox"/> not well | <input type="checkbox"/> not informed at all | <input type="checkbox"/> yes                       | <input type="checkbox"/> no |
| Treatment/therapy                                     | <input type="checkbox"/> very well | <input type="checkbox"/> well | <input type="checkbox"/> not well | <input type="checkbox"/> not informed at all | <input type="checkbox"/> yes                       | <input type="checkbox"/> no |
| Acute complications                                   | <input type="checkbox"/> very well | <input type="checkbox"/> well | <input type="checkbox"/> not well | <input type="checkbox"/> not informed at all | <input type="checkbox"/> yes                       | <input type="checkbox"/> no |
| Late complications                                    | <input type="checkbox"/> very well | <input type="checkbox"/> well | <input type="checkbox"/> not well | <input type="checkbox"/> not informed at all | <input type="checkbox"/> yes                       | <input type="checkbox"/> no |
| Diabetes in everyday life                             | <input type="checkbox"/> very well | <input type="checkbox"/> well | <input type="checkbox"/> not well | <input type="checkbox"/> not informed at all | <input type="checkbox"/> yes                       | <input type="checkbox"/> no |
| Mental strain                                         | <input type="checkbox"/> very well | <input type="checkbox"/> well | <input type="checkbox"/> not well | <input type="checkbox"/> not informed at all | <input type="checkbox"/> yes                       | <input type="checkbox"/> no |
| Lifestyle adjustment, health promotion and prevention | <input type="checkbox"/> very well | <input type="checkbox"/> well | <input type="checkbox"/> not well | <input type="checkbox"/> not informed at all | <input type="checkbox"/> yes                       | <input type="checkbox"/> no |
| Support, helplines and information sources            | <input type="checkbox"/> very well | <input type="checkbox"/> well | <input type="checkbox"/> not well | <input type="checkbox"/> not informed at all | <input type="checkbox"/> yes                       | <input type="checkbox"/> no |
| Social and legal aspects                              | <input type="checkbox"/> very well | <input type="checkbox"/> well | <input type="checkbox"/> not well | <input type="checkbox"/> not informed at all | <input type="checkbox"/> yes                       | <input type="checkbox"/> no |

| How well informed are you on the following topics?                                                                                                                                          | Would you currently like information on the topic?       |
|---------------------------------------------------------------------------------------------------------------------------------------------------------------------------------------------|----------------------------------------------------------|
| Scientific surveys and research on diabetes <input type="checkbox"/> very well <input type="checkbox"/> well <input type="checkbox"/> not well <input type="checkbox"/> not informed at all | <input type="checkbox"/> yes <input type="checkbox"/> no |
| Other topics not included in the list:<br>_____                                                                                                                                             | <input type="checkbox"/> yes <input type="checkbox"/> no |

3. What do you consider to be particularly important with regard to information on diabetes?

---



---



---



---



---
